# Supplementary material for: Exploring the Generalizability and Explainability of LLMs in Detecting Suicidal Ideation: The Impact of Data Heterogeneity
Source: Research Square preprint supplement (doi:10.21203/rs.3.rs-7657467/v1), 2025-11-12
Supplement: Supplementary file 1 [file c2269401b2e53d447acd4148.docx]

**Supplementary material**

**Supp Table 1. Example of LIWC language features/categories.**

| **LIWC Categories (abbr)** | **Examples** |
| --- | --- |
| family-related words (family) | 妹妹 (sister), 哥哥 (brother), 愛人 (lover), 父母 (parent) |
| religion-related words (relig) | 信念 (belief), 懺悔(repentance), 報應(karma), 頌揚(praise) |
| tentative words (tentat) | 或許 (maybe), 可能 (possible), 有時 (sometimes), 大致(rough) |
| negative emotion words (negemo) | 不安 (insecure), 否認 (deny), 不悅 (unhappy), 分歧 (disagree) |
| impersonal pronouns (ipron) | 他們 (they), 那個 (that), 它 (it), 另一個 (another) |

**Supp Table 2. Language pattern of two patient groups across different topics.**

| **Topic** | **Language Feature[[1]](#footnote-1)** | **Non-Alexithymia** | **Alexithymia** | **p-value** |
| --- | --- | --- | --- | --- |
| Mood-related | family-related words | 0.07 (0.15) | 0.17 (0.27) | .001** |
| religion-related words | 0.18 (0.38) | 0.30 (0.43) | .03* |
| tentative words* | 2.42 (1.23) | 2.83 (1.21) | .007** |
| impersonal pronouns * | 0.56 (0.56) | 0.77 (0.63) | .005** |
| negative emotion words* | 2.29 (1.04) | 2.35 (1.15) | .34 |
| Suicide-specific | family-related words | 0 (0) | 0.13 (0.61) | .01* |
| religion-related words | 0.12 (1.20) | 0.33 (2.19) | .18 |
| tentative words* | 0.83 (3.09) | 2.85 (6.83) | .03* |
| impersonal pronouns* | 0.23 (1.35) | 0.27 (1.06) | .41 |
| negative emotion words* | 0.47 (2.91) | 1.16 (3.29) | .05 |

*Note.* The frequency of word use was calculated as proportion (i.e., the number of the word use/total word count x 100%). p < 0.05*, p < 0.01**, p < 0.001***

1. Language features with significant mean differences between topics were marked with*. [↑](#footnote-ref-1)
